# Supplementary material for: Rod-like NaNbO3: mechanisms for stable solvothermal synthesis, temperature-mediated phase transitions and morphological evolution
Source: Royal Society of Chemistry journal article supplement (doi:10.1039/c3ra47391k), 2014-01-01
Supplement: c3ra47391k1.pdf [file c3ra47391k1.pdf]

**Supplementary Information for:**

**Rod-like NaNbO<sub>3</sub>: mechanisms for stable solvothermal synthesis, temperature-mediated phase transitions and morphological evolutions**

Qilin Gu,<sup>1,2</sup> Kongjun Zhu,<sup>1\*</sup> Jinsong Liu,<sup>2</sup> Pengcheng Liu,<sup>1,2</sup> Yang Cao,<sup>3</sup> Jinhao Qiu<sup>1</sup>

<sup>1</sup>State Key Laboratory of Mechanics and Control of Mechanical Structures, College of Aerospace Engineering, Nanjing University of Aeronautics and Astronautics, Nanjing, 210016, P. R. China

<sup>2</sup>College of Materials Science and Engineering, Nanjing University of Aeronautics and Astronautics, Nanjing 210016, China

<sup>3</sup>Center for Interdisciplinary Research, Tohoku University, Sendai, Miyagi 982, Japan

**\*Corresponding Author:** E-mail address: kjzhu@nuaa.edu.cn

The temperature-induced structural transitions of the sodium niobate could be further elucidated by Raman spectrum survey [Figure S1(a)]. The major Raman bands of Na<sub>7</sub>(H<sub>3</sub>O)Nb<sub>6</sub>O<sub>19</sub>·14H<sub>2</sub>O appeared in the regions of 100–300 cm<sup>-1</sup>, 500–550 cm<sup>-1</sup>, and 800–900 cm<sup>-1</sup>. Among these regions, ν<sub>5</sub> (282 cm<sup>-1</sup>) is assigned to an Nb-O stretching mode, ν<sub>1</sub> (212 cm<sup>-1</sup> and 155 cm<sup>-1</sup>) are two Nb-O-Nb bending modes, and 833 cm<sup>-1</sup> stand for the short Nb = O terminal double bonds. In each Lindquist ion of Na<sub>7</sub>(H<sub>3</sub>O)Nb<sub>6</sub>O<sub>19</sub>·14H<sub>2</sub>O, six NbO<sub>6</sub> octahedra create a larger octahedron by sharing edges, and Na atoms are scattered within the vacancies between the Lindquist octahedral sites [Figure S1(b)]. The edge-shared NbO<sub>6</sub> octahedra structures are also reflected by the bands at 524 and 904 cm<sup>-1</sup>, which represent the edge-shared octahedral NbO<sub>6</sub> stretching mode and Nb = O surface sites, respectively. Considering the NaNbO<sub>3</sub> with an orthorhombic and monoclinic perovskite structure, the major

Raman band of the perovskite structures appears in the 600–615  $\text{cm}^{-1}$  ( $\nu_1$ ) region and is accompanied by a shoulder at around 570  $\text{cm}^{-1}$  ( $\nu_2$ ). These results are analogous to findings in a previous report.<sup>1</sup> Both orthorhombic and monoclinic forms are ideal perovskite structures with different degrees of distortion, which yields differences in their band distances and angles [Figure S1(c)]. A higher metal-oxygen bond order, which corresponds to a shorter bond distance, shifts the Raman bands to higher wavenumbers. As such, the Raman spectra of O-NaNbO<sub>3</sub> and M-NaNbO<sub>3</sub> are very similar except for some slight shifts. The sharpening of Raman bands from O-NaNbO<sub>3</sub> to M-NaNbO<sub>3</sub> as well as the additional small peak existing between 340 and 360 $\text{cm}^{-1}$  is likely induced by different distorted niobium oxide compounds.<sup>2</sup> The Raman spectra prove the strong dependence of the phase transformations of niobium oxide on the heat treatments.

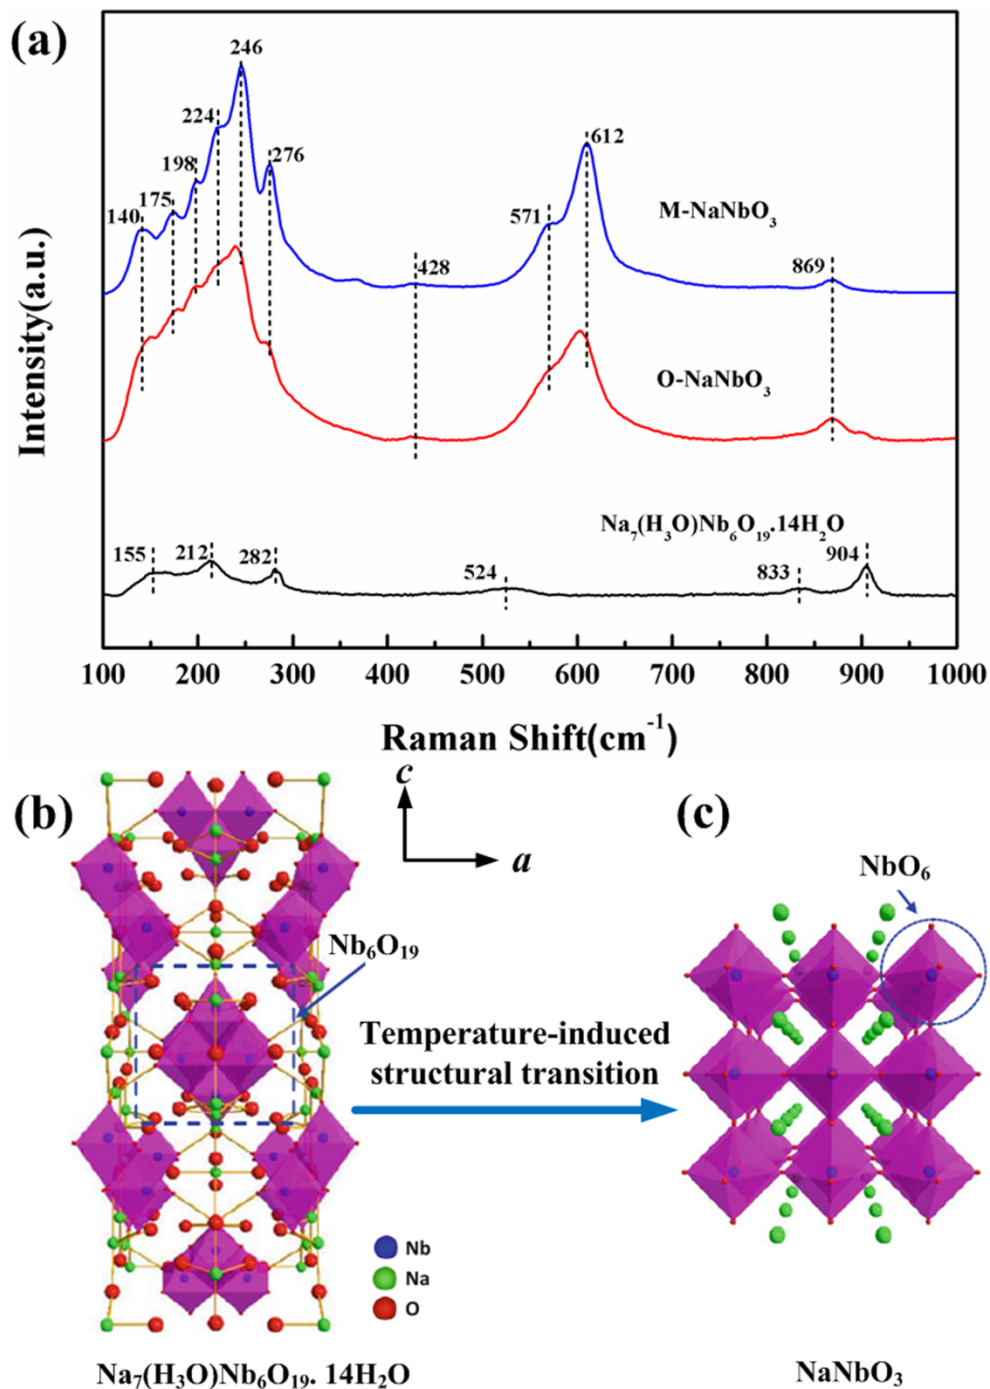

**Figure S1.** Raman spectra of  $\text{Na}_7(\text{H}_3\text{O})\text{Nb}_6\text{O}_{19}\cdot 14\text{H}_2\text{O}$  and the products treated at  $400^\circ\text{C}$  ( $\text{O-NaNbO}_3$ ) and  $800^\circ\text{C}$  ( $\text{M-NaNbO}_3$ ), respectively.

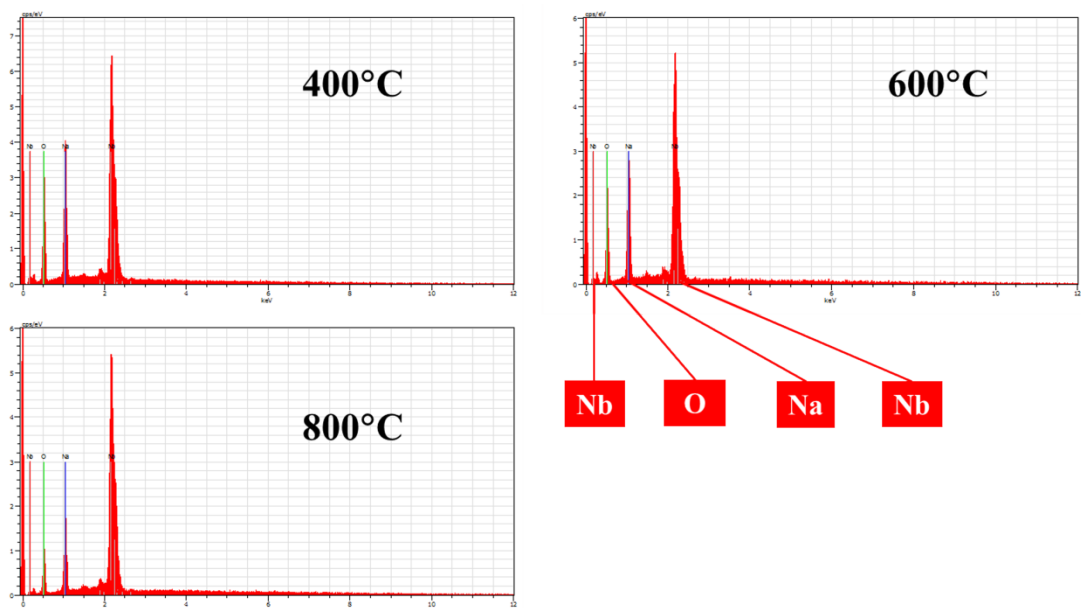

**Figure S2.** Compositional analysis of solvothermal synthesized powders treated at 400°C, 600°C, 800°C by Energy-dispersive X-ray spectroscopy (EDS), respectively.

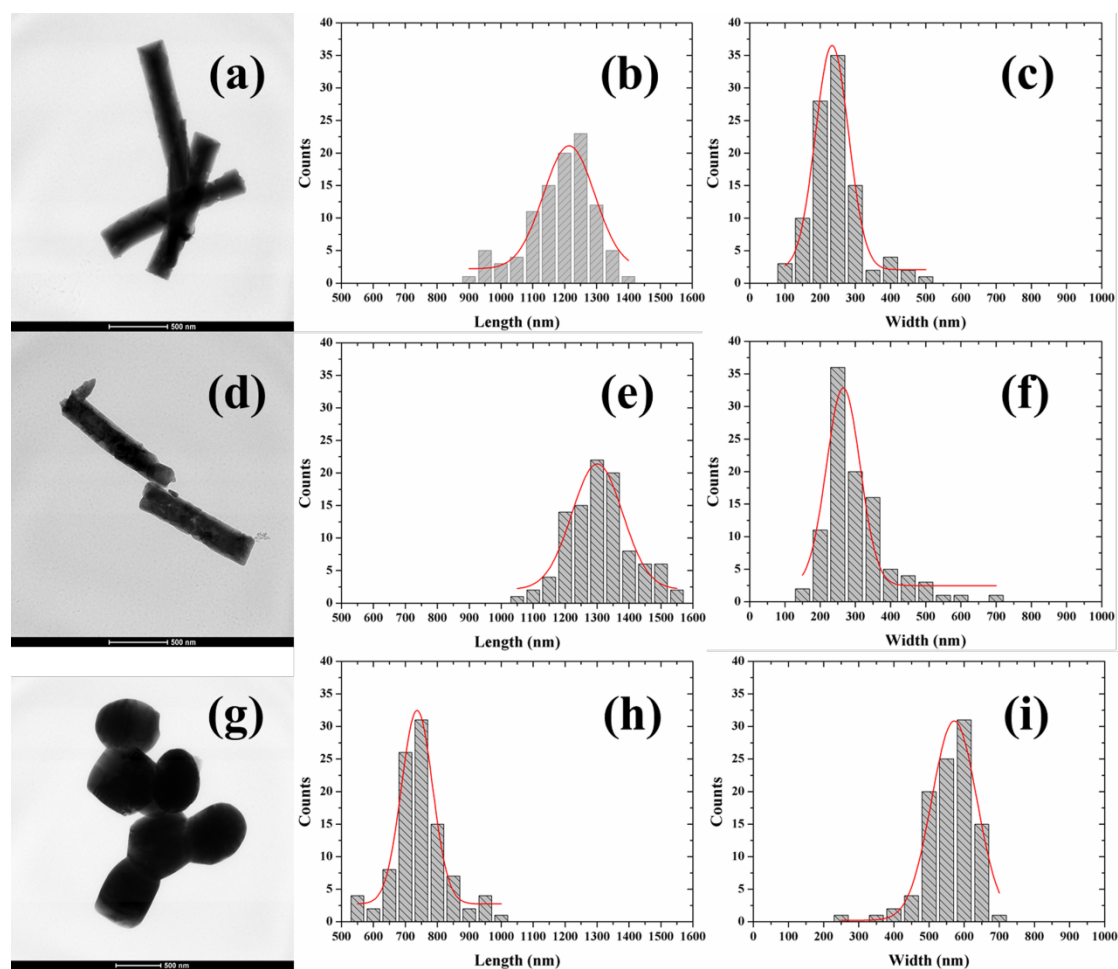

**Figure S3.** (a) (d) (g) Representative TEM images and size distributions in (b) (e) (h) length and (c) (f) (i) width of powders (a) (b) (c) synthesized solvothermally and treated at (d) (e) (f) 400°C and (g) (h) (i) 600°C for 4h, respectively.

## Reference

- (1) R. J. C. Lima,; P. T. C. Freire, J. M. Sasaki, A. P. Ayala, F. E. A. Melo, J. M. Filho, K. C. Serra, S. Lanfredi, M. H. Lente, J. A. Eiras, *J. Raman Spectrosc.*, 2002, 33, 669–674.
- (2) J. M. Jehng, I. E. Wachs, *Chem. Mater.*, 1991, 3, 100–107.
